# Supplementary material for: Transcriptome-wide effects of inverted SINEs on gene expression and their impact on RNA polymerase II activity
Source: PubMed Central journal article supplement (PMC5080714; doi:10.1186/s13059-016-1083-0), 2016-10-25
Supplement: 13059_2016_1083_MOESM2_ESM.pdf [file 13059_2016_1083_MOESM2_ESM.pdf]

**Supplementary Table S1: Primer sequences used for qPCR to quantify expression and for the CHIP-experiments.**

**qPCR primers for cDNA**

|                    |      |                        |
|--------------------|------|------------------------|
| Renilla            | Fw-  | AGATCATGCGGAAACTGGAG   |
|                    | Rev- | CGAAGGTAGGCGTTGTAGTTG  |
| Firefly in pHRLTK  | Fw-  | GTGCCAACCCCTATTCTCCTTC |
|                    | Rev- | CCGCTTCCCCGACTTCCTTAG  |
| Firefly in pmirGLO | Fw-  | GGCTGAATACAAACCATCGG   |
|                    | Rev- | CGCTCGTTGTAGATGTCGTTAG |

**CHIP primers for Reporter-based assays**

|                        |      |                             |
|------------------------|------|-----------------------------|
| <i>Nicn1</i> - Part A  | Fw-  | TCTGCGGCTTTCGGGTCGTG        |
|                        | Rev- | CCGCTGGCGATCTCGTGCAAG       |
| <i>Nicn1</i> - Part B  | Fw-  | GGCGGCAAGATCGCCGTGTA        |
|                        | Rev- | GGCCCTATGGGCACACCCAC        |
| <i>Nicn1</i> - Part C  | Fw-  | CGGCCGCTTCGAGCAGACAT        |
|                        | Rev- | TCACTGCATTCTAGTTGTGGTTTGTCC |
| <i>Znf708</i> - Part A | Fw-  | TCTGCGGCTTTCGGGTCGTG        |
|                        | Rev- | CCGCTGGCGATCTCGTGCAAG       |
| <i>Znf708</i> - Part B | Fw-  | GGCGGCAAGATCGCCGTGTA        |
|                        | Rev- | ACCATGCCCCGGCCCTACCTC       |
| <i>Znf708</i> - Part C | Fw-  | CGGCCGCTTCGAGCAGACAT        |
|                        | Rev- | TCACTGCATTCTAGTTGTGGTTTGTCC |

**CHIP primers for endogenous targets**

|                        |      |                      |
|------------------------|------|----------------------|
| <i>KIF1B</i> - Part A  | Fw-  | AATGTGTGGGAGCCTTTTTG |
|                        | Rev- | CAGGGGTAGGAATGGAGGAT |
| <i>KIF1B</i> - Part B  | Fw-  | GTTGTGGCGGGAAAGTTAAG |
|                        | Rev- | TGATGGGAGAAAGGAGGATG |
| <i>KIF1B</i> - Part C  | Fw-  | GAGGTTGGTCTCTTGCCAAA |
|                        | Rev- | GCTGAGGGACTCCTCAAGTG |
| <i>UBIAD1</i> - Part A | Fw-  | CATGTTTACCAGCCGGAGTT |
|                        | Rev- | GCCACTGGAAGGACAAACAT |
| <i>UBIAD1</i> - Part B | Fw-  | GGCTGTTTTCCCTTTGTTGA |
|                        | Rev- | GGGCTTTGAGTATCCCACAA |
| <i>UBIAD1</i> - Part C | Fw-  | CTTCCCAGCACCATTTTTGT |
|                        | Rev- | CAGAACTGATAGCCCCGATG |
| <i>OTUD3</i> - Part A  | Fw-  | ACACTGTTTTCCCTGGATGC |
|                        | Rev- | GGGAGAGTAAAAATGGCAAA |
| <i>OTUD3</i> - Part B  | Fw-  | CGGGGAGTTGCTCACATATT |
|                        | Rev- | CCAGTAAAACCCAGGCAGAG |
| <i>OTUD3</i> - Part C  | Fw-  | CCTCCACCAGCACTAAGCTC |

|                         |                               |
|-------------------------|-------------------------------|
| <i>SPAG9</i> - Part A   | Rev- GACGCATGCCAACACTTCTA     |
|                         | Fw- TATTTCCCTTGAGGGGGTTG      |
| <i>SPAG9</i> - Part B   | Rev- AGTACGCAGCACACCATCAG     |
|                         | Fw- CCCCCAAATCTGATGAAAAC      |
| <i>SPAG9</i> - Part C   | Rev- GTCCCGAGAGGGTTAAAAGC     |
|                         | Fw- AACATGGCTGAACAACAGCA      |
| <i>AHR</i> - Part A     | Rev- TCTGAGCCATTTTTGGCAAT     |
|                         | Fw- ACCAGGGTTACACTCTTTGTTCA   |
| <i>AHR</i> - Part B     | Rev- AAACCTCATGGGCCAAAATG     |
|                         | Fw- AAGCAAAGCACCCATTCAA       |
| <i>AHR</i> - Part C     | Rev- ACTTTGCACCAAACCTTGCT     |
|                         | Fw- TTGTTAAGTGCCAAACAAAGGA    |
| <i>ATG12</i> - Part A   | Rev- GAAAAACCTGGTACAGGAAAAGA  |
|                         | Fw- AAAACGAATCTCCGAACGTC      |
| <i>ATG12</i> - Part B   | Rev- ACTCCATTTCCACCTGATG      |
|                         | Fw- TTTGAGGTATTAGCCAGCA       |
| <i>ATG12</i> - Part C   | Rev- CTGCCTCCAAGGTTGAAAAG     |
|                         | Fw- TGTGTGCCATGGGTCATCTA      |
| <i>DES1</i> - Part A    | Rev- AAGCCTGGATCCGATAAGTT     |
|                         | Fw- TGCAAGTCCCCTCCAGTAAG      |
| <i>DES1</i> - Part B    | Rev- GCTGAATTGACCCCAAAGAG     |
|                         | Fw- CTTTCTGGGTCACGGATGTT      |
| <i>DES1</i> - Part C    | Rev- TGCTGTTTCCTAAGCGTCCT     |
|                         | Fw- CTGGCAAATCAGTGGGTCTT      |
| <i>DPY19L4</i> - Part A | Rev- CATCAGCCATCACAGTTTGG     |
|                         | Fw- TTCAATAGCCGGGCACTATC      |
| <i>DPY19L4</i> - Part B | Rev- GTCCCAAAGGGCTGTTGTAA     |
|                         | Fw- CCTGTGCTGAATTAGGTTTGG     |
| <i>DPY19L4</i> - Part C | Rev- CCTTTTCAACTGATGCTGGA     |
|                         | Fw- TGGCATCTGTATCTTGGTGCT     |
|                         | Rev- TGCTGCCTATATACAGAAAGTAAA |
